# Supplementary material for: Selective production of bio-based aromatics by aerobic oxidation of native soft wood lignin in tetrabutylammonium hydroxide
Source: Royal Society of Chemistry journal article supplement (doi:10.1039/d0ra03420g), 2020-01-01
Supplement: d0ra03420g1.pdf [file d0ra03420g1.pdf]

## Supporting information

### Selective production of bio-based aromatics by aerobic oxidation of native soft wood lignin in tetrabutylammonium hydroxide

Takashi Hosoya,<sup>†□</sup>Kohei Yamamoto,<sup>†□</sup>Hisashi Miyafuji,<sup>†\*</sup> Tatsuhiko Yamada<sup>‡</sup>

<sup>†□</sup> Graduate School of Life and Environmental Sciences,  
Kyoto Prefectural University, Japan  
1-5 Shimogamo-hangi-cho, Sakyo-ku, Kyoto 606-8522, Japan  
E-mail: miyafuji@kpu.ac.jp

<sup>‡□</sup> Forestry and Forest Products Research Institute, Japan  
1 Matsunosato, Tsukuba, Ibaragi 305-8687, Japan

#### Contents

|                                                                                                                                      |       |
|--------------------------------------------------------------------------------------------------------------------------------------|-------|
| Total ion chromatogram in GC/MS analysis of the acetylated reaction mixture obtained after the degradation of <b>LM1</b> (Figure S1) | S2    |
| Values in Figures 1, 3, and 5.                                                                                                       | S3-S5 |

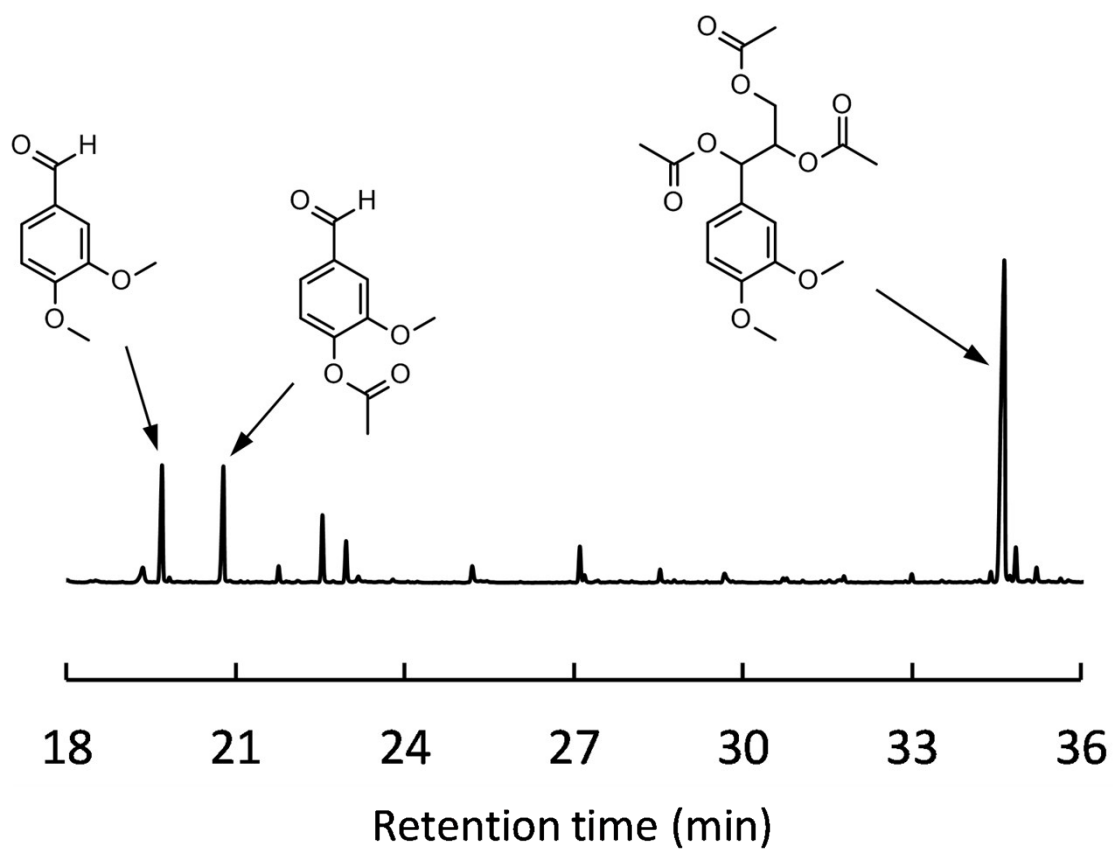

**Figure S1.** Total ion chromatogram in GC/MS analysis of the acetylated reaction mixture obtained after the degradation of **LM1** in 1.25 mol/L Bu<sub>4</sub>NOH for 4 h under air. The identification of the large peak at 34.6 min was made from its molecular ion peak indicating m/z=354.

## Values in Figure 1

### Figure 1A

| Reaction time (h) | Vanillin (wt%) | Vanillic acid (wt%) | Total (wt%) |
|-------------------|----------------|---------------------|-------------|
| 0                 | 0              | 0                   | 0           |
| 1                 | 9.7            | 2.4                 | 12.1        |
| 2                 | 16.3           | 2.8                 | 19.1        |
| 4                 | 17.6           | 3.0                 | 20.6        |
| 8                 | 19.8           | 1.8                 | 21.6        |
| 20                | 17.0           | 0.6                 | 17.5        |

### Figure 1B

| Reaction time (h) | Vanillin (wt%) | Vanillic acid (wt%) | Total (wt%) |
|-------------------|----------------|---------------------|-------------|
| 0                 | 0              | 0                   | 0           |
| 1.5               | 18.3           | 2.9                 | 21.2        |
| 2.5               | 20.0           | 1.3                 | 21.4        |
| 4                 | 23.0           | 1.2                 | 24.2        |
| 6                 | 21.1           | 0.82                | 22.0        |
| 7.25              | 19.3           | 1.1                 | 20.4        |
| 20                | 16.2           | 0.33                | 16.6        |

### Figure 1C

| Reaction time (h) | Vanillin (wt%) | Vanillic acid (wt%) | Total (wt%) |
|-------------------|----------------|---------------------|-------------|
| 0                 | 0              | 0                   | 0           |
| 10                | 7.8            | 2.0                 | 9.8         |
| 18                | 11.6           | 2.9                 | 14.5        |
| 43                | 15.3           | 3.                  | 18.8        |
| 70                | 14.1           | 3.7                 | 17.9        |

### Values in Figure 3

#### Figure 3A

|                        |     |      |      |      |      |      |      |
|------------------------|-----|------|------|------|------|------|------|
| Reaction time (h)      | 0   | 1    | 4    | 6    | 16   | 24   | 43   |
| Veratrylalcohol (mol%) | 0   | 0.9  | 2.2  | 3.5  | 7.0  | 8.5  | 9.1  |
| Vanillin (mol%)        | 0   | 0.5  | 2.5  | 4.5  | 10.5 | 14.0 | 15.7 |
| Veratric acid (mol%)   | 0   | 1.1  | 2.5  | 3.0  | 6.1  | 6.7  | 6.7  |
| Veratraldehyde (mol%)  | 0   | 4.7  | 7.4  | 6.5  | 6.8  | 3.8  | 2.2  |
| Total A Ring (mol%)    | 0   | 7.2  | 14.6 | 17.5 | 30.4 | 33.0 | 33.7 |
| Guaiacol (mol%)        | 0   | 12.3 | 31.0 | 43.0 | 45.9 | 47.6 | 48.4 |
| Recovery of LM1 (%)    | 100 | 86.4 | 56.7 | 40.2 | 15.4 | 8.2  | 3.7  |

#### Figure 3B

|                        |     |      |      |      |      |
|------------------------|-----|------|------|------|------|
| Reaction time (h)      | 0   | 1    | 6    | 24   | 43   |
| Veratrylalcohol (mol%) | 0   | 0.3  | 2.2  | 2.9  | 3.9  |
| Vanillin (mol%)        | 0   | 0.1  | 0.8  | 0.59 | 0.4  |
| Veratric acid (mol%)   | 0   | 0.4  | 3.0  | 4.6  | 5.4  |
| Veratraldehyde (mol%)  | 0   | 1.9  | 6.0  | 5.7  | 5.2  |
| Total A Ring (mol%)    | 0   | 2.7  | 12.0 | 13.8 | 14.8 |
| Guaiacol (mol%)        | 0   | 2.3  | 1.8  | 0.1  | 0.16 |
| Recovery of LM1 (%)    | 100 | 89.5 | 74.8 | 66.6 | 57.1 |

## Values in Figure 5

### Figure 5A

|                            |     |      |      |      |      |      |
|----------------------------|-----|------|------|------|------|------|
| Reaction time (h)          | 0   | 0.25 | 0.5  | 1    | 2    | 4    |
| Recovery of <b>LM2</b> (%) | 100 | 69.5 | 56.4 | 21.2 | 10.6 | 1    |
| Enol ethers (mol%)         | 0   | 13.5 | 26.1 | 34.1 | 34.7 | 20.6 |
| Vanillin (mol%)            | 0   | 9.2  | 23.5 | 40.8 | 45.4 | 59.5 |
| Vanillic acid (mol%)       | 0   | 0.0  | 4.1  | 6.4  | 9.1  | 12.7 |
| Guaiacol (mol%)            | 0   | 10.1 | 21.9 | 39.5 | 48.4 | 61.9 |

### Figure 5B

|                            |     |      |      |      |      |      |
|----------------------------|-----|------|------|------|------|------|
| Reaction time (h)          | 0   | 0.25 | 0.5  | 1    | 2    | 4    |
| Recovery of <b>LM2</b> (%) | 100 | 88.2 | 78.7 | 50.3 | 35   | 7.4  |
| Enol ethers (mol%)         | 0   | 6.4  | 13.8 | 30.4 | 17.9 | 6    |
| Vanillin (mol%)            | 0   | 5.4  | 11.9 | 23.3 | 38.7 | 83.8 |
| Vanillic acid (mol%)       | 0   | 0    | 0.4  | 1.4  | 1.6  | 5.9  |
| Guaiacol (mol%)            | 0   | 5.4  | 13.1 | 22.1 | 39.2 | 65.5 |
